# Supplementary material for: Large-Scale Analyses of Site-Specific Evolutionary Rates across Eukaryote Proteomes Reveal Confounding Interactions between Intrinsic Disorder, Secondary Structure, and Functional Domains
Source: MDPI journal article supplement (doi:10.3390/genes9110553), 2018-11-14
Supplement: s1 [file s1]

**Supplementary Table 2 – Nonparametric *Post Hoc* Multiple Comparison Results.**

Supplementary Table 2

| Nonparametric <i>Post Hoc</i> Multiple Comparison Results   |           |        |                 |            |
|-------------------------------------------------------------|-----------|--------|-----------------|------------|
| (TURE = significant; Corrected Alpha = 0.05)                |           |        |                 |            |
| Comparison                                                  | Metazoans | Plants | Saccharomycetes | Alveolates |
| Disordered-Coil-Domain vs. Disordered-Coil-Linker           | TRUE      | TRUE   | TRUE            | TRUE       |
| Disordered-Coil-Domain vs. Disordered-Structure-Domain      | FALSE     | FALSE  | FALSE           | TRUE       |
| Disordered-Coil-Domain vs. Disordered-Structure-Linker      | TRUE      | TRUE   | FALSE           | TRUE       |
| Disordered-Coil-Domain vs. Ordered-Coil-Domain              | TRUE      | TRUE   | TRUE            | FALSE      |
| Disordered-Coil-Domain vs. Ordered-Coil-Linker              | TRUE      | TRUE   | TRUE            | FALSE      |
| Disordered-Coil-Domain vs. Ordered-Structure-Domain         | TRUE      | TRUE   | TRUE            | TRUE       |
| Disordered-Coil-Domain vs. Ordered-Structure-Linker         | TRUE      | TRUE   | TRUE            | TRUE       |
| Disordered-Coil-Linker vs. Disordered-Structure-Domain      | TRUE      | TRUE   | TRUE            | TRUE       |
| Disordered-Coil-Linker vs. Disordered-Structure-Linker      | TRUE      | FALSE  | TRUE            | TRUE       |
| Disordered-Coil-Linker vs. Ordered-Coil-Domain              | TRUE      | TRUE   | TRUE            | TRUE       |
| Disordered-Coil-Linker vs. Ordered-Coil-Linker              | TRUE      | TRUE   | TRUE            | TRUE       |
| Disordered-Coil-Linker vs. Ordered-Structure-Domain         | TRUE      | TRUE   | TRUE            | TRUE       |
| Disordered-Coil-Linker vs. Ordered-Structure-Linker         | TRUE      | TRUE   | TRUE            | TRUE       |
| Disordered-Structure-Domain vs. Disordered-Structure-Linker | TRUE      | TRUE   | FALSE           | TRUE       |
| Disordered-Structure-Domain vs. Ordered-Coil-Domain         | FALSE     | TRUE   | FALSE           | TRUE       |
| Disordered-Structure-Domain vs. Ordered-Coil-Linker         | TRUE      | TRUE   | FALSE           | TRUE       |
| Disordered-Structure-Domain vs. Ordered-Structure-Domain    | TRUE      | TRUE   | TRUE            | FALSE      |
| Disordered-Structure-Domain vs. Ordered-Structure-Linker    | TRUE      | TRUE   | TRUE            | TRUE       |
| Disordered-Structure-Linker vs. Ordered-Coil-Domain         | TRUE      | TRUE   | FALSE           | TRUE       |
| Disordered-Structure-Linker vs. Ordered-Coil-Linker         | FALSE     | TRUE   | FALSE           | FALSE      |
| Disordered-Structure-Linker vs. Ordered-Structure-Domain    | FALSE     | TRUE   | TRUE            | TRUE       |
| Disordered-Structure-Linker vs. Ordered-Structure-Linker    | TRUE      | TRUE   | TRUE            | FALSE      |
| Ordered-Coil-Domain vs. Ordered-Coil-Linker                 | TRUE      | TRUE   | FALSE           | TRUE       |
| Ordered-Coil-Domain vs. Ordered-Structure-Domain            | TRUE      | TRUE   | TRUE            | TRUE       |
| Ordered-Coil-Domain vs. Ordered-Structure-Linker            | TRUE      | TRUE   | TRUE            | TRUE       |
| Ordered-Coil-Linker vs. Ordered-Structure-Domain            | TRUE      | TRUE   | TRUE            | TRUE       |
| Ordered-Coil-Linker vs. Ordered-Structure-Linker            | TRUE      | TRUE   | TRUE            | TRUE       |
| Ordered-Structure-Domain vs. Ordered-Structure-Linker       | TRUE      | TRUE   | FALSE           | TRUE       |
