# Supplementary material for: Large-Scale Analyses of Site-Specific Evolutionary Rates across Eukaryote Proteomes Reveal Confounding Interactions between Intrinsic Disorder, Secondary Structure, and Functional Domains
Source: MDPI journal article supplement (doi:10.3390/genes9110553), 2018-11-14
Supplement: s1 [file s1]

**Supplementary Table 1 – GO Term results:** Gene ontology results obtained from PantherDB [32,33] for protein sequences containing conserved disordered-structured sites.

Supplementary table 1.

Sheet1

|                          |                                             | Molecular Function |            |         |
|--------------------------|---------------------------------------------|--------------------|------------|---------|
| #                        | GO Term                                     | Count              | % Proteins | % Terms |
| Homo sapiens             |                                             |                    |            |         |
| 1                        | binding (GO:0005488)                        | 1127               | 34.40%     | 53.30%  |
| 2                        | catalytic activity (GO:0003824)             | 652                | 19.90%     | 30.80%  |
| 3                        | structural molecule activity (GO:0005198)   | 101                | 3.10%      | 4.80%   |
| 4                        | transporter activity (GO:0005215)           | 97                 | 3.00%      | 4.60%   |
| 5                        | signal transducer activity (GO:0004871)     | 56                 | 1.70%      | 2.60%   |
| 6                        | receptor activity (GO:0004872)              | 55                 | 1.70%      | 2.60%   |
| 7                        | translation regulator activity (GO:0045182) | 25                 | 0.80%      | 1.20%   |
| 8                        | channel regulator activity (GO:0016247)     | 2                  | 0.10%      | 0.10%   |
| Arabidopsis thaliana     |                                             |                    |            |         |
| 1                        | binding (GO:0005488)                        | 574                | 22.20%     | 43.00%  |
| 2                        | catalytic activity (GO:0003824)             | 527                | 20.40%     | 39.50%  |
| 3                        | structural molecule activity (GO:0005198)   | 114                | 4.40%      | 8.50%   |
| 4                        | transporter activity (GO:0005215)           | 44                 | 1.70%      | 3.30%   |
| 5                        | translation regulator activity (GO:0045182) | 38                 | 1.50%      | 2.80%   |
| 6                        | receptor activity (GO:0004872)              | 15                 | 0.60%      | 1.10%   |
| 7                        | signal transducer activity (GO:0004871)     | 12                 | 0.50%      | 0.90%   |
| 8                        | antioxidant activity (GO:0016209)           | 11                 | 0.40%      | 0.80%   |
| Saccharomyces cerevisiae |                                             |                    |            |         |
| 1                        | binding (GO:0005488)                        | 274                | 31.50%     | 40.50%  |
| 2                        | catalytic activity (GO:0003824)             | 268                | 30.80%     | 39.60%  |
| 3                        | structural molecule activity (GO:0005198)   | 78                 | 9.00%      | 11.50%  |
| 4                        | transporter activity (GO:0005215)           | 26                 | 3.00%      | 3.80%   |
| 5                        | translation regulator activity (GO:0045182) | 23                 | 2.60%      | 3.40%   |
| 6                        | signal transducer activity (GO:0004871)     | 4                  | 0.50%      | 0.60%   |
| 7                        | receptor activity (GO:0004872)              | 3                  | 0.30%      | 0.40%   |
| 8                        | antioxidant activity (GO:0016209)           | 1                  | 0.10%      | 0.10%   |
| Plasmodium falciparum    |                                             |                    |            |         |
| 1                        | binding (GO:0005488)                        | 157                | 29.50%     | 41.80%  |
| 2                        | catalytic activity (GO:0003824)             | 146                | 27.40%     | 38.80%  |
| 3                        | structural molecule activity (GO:0005198)   | 36                 | 6.80%      | 9.60%   |
| 4                        | transporter activity (GO:0005215)           | 18                 | 3.40%      | 4.80%   |
| 5                        | translation regulator activity (GO:0045182) | 17                 | 3.20%      | 4.50%   |
| 6                        | receptor activity (GO:0004872)              | 1                  | 0.20%      | 0.30%   |
| 7                        | antioxidant activity (GO:0016209)           | 1                  | 0.20%      | 0.30%   |

Supplementary table 1.

| Biological Process       |                                                            |       |                    |
|--------------------------|------------------------------------------------------------|-------|--------------------|
| #                        | GO Term                                                    | Count | % Proteins % Terms |
| Homo sapiens             |                                                            |       |                    |
| 1                        | cellular process (GO:0009987)                              | 1533  | 46.80% 30.10%      |
| 2                        | metabolic process (GO:0008152)                             | 1218  | 37.20% 23.90%      |
| 3                        | cellular component organization or biogenesis (GO:0071840) | 529   | 16.20% 10.40%      |
| 4                        | biological regulation (GO:0065007)                         | 369   | 11.30% 7.20%       |
| 5                        | developmental process (GO:0032502)                         | 362   | 11.10% 7.10%       |
| 6                        | localization (GO:0051179)                                  | 329   | 10.00% 6.50%       |
| 7                        | response to stimulus (GO:0050896)                          | 314   | 9.60% 6.20%        |
| 8                        | multicellular organismal process (GO:0032501)              | 244   | 7.50% 4.80%        |
| 9                        | immune system process (GO:0002376)                         | 64    | 2.00% 1.30%        |
| 10                       | biological adhesion (GO:0022610)                           | 54    | 1.60% 1.10%        |
| 11                       | locomotion (GO:0040011)                                    | 42    | 1.30% 0.80%        |
| 12                       | reproduction (GO:0000003)                                  | 31    | 0.90% 0.60%        |
| 13                       | rhythmic process (GO:0048511)                              | 5     | 0.20% 0.10%        |
| 14                       | growth (GO:0040007)                                        | 4     | 0.10% 0.10%        |
| Arabidopsis thaliana     |                                                            |       |                    |
| 1                        | metabolic process (GO:0008152)                             | 903   | 34.90% 35.30%      |
| 2                        | cellular process (GO:0009987)                              | 894   | 34.50% 34.90%      |
| 3                        | cellular component organization or biogenesis (GO:0071840) | 294   | 11.40% 11.50%      |
| 4                        | localization (GO:0051179)                                  | 164   | 6.30% 6.40%        |
| 5                        | response to stimulus (GO:0050896)                          | 134   | 5.20% 5.20%        |
| 6                        | biological regulation (GO:0065007)                         | 104   | 4.00% 4.10%        |
| 7                        | developmental process (GO:0032502)                         | 32    | 1.20% 1.30%        |
| 8                        | reproduction (GO:0000003)                                  | 20    | 0.80% 0.80%        |
| 9                        | multicellular organismal process (GO:0032501)              | 11    | 0.40% 0.40%        |
| 10                       | rhythmic process (GO:0048511)                              | 2     | 0.10% 0.10%        |
| Saccharomyces cerevisiae |                                                            |       |                    |
| 1                        | cellular process (GO:0009987)                              | 478   | 54.90% 35.40%      |
| 2                        | metabolic process (GO:0008152)                             | 434   | 49.80% 32.10%      |
| 3                        | cellular component organization or biogenesis (GO:0071840) | 226   | 25.90% 16.70%      |
| 4                        | localization (GO:0051179)                                  | 95    | 10.90% 7.00%       |
| 5                        | response to stimulus (GO:0050896)                          | 59    | 6.80% 4.40%        |
| 6                        | biological regulation (GO:0065007)                         | 55    | 6.30% 4.10%        |
| 7                        | reproduction (GO:0000003)                                  | 4     | 0.50% 0.30%        |
| 8                        | developmental process (GO:0032502)                         | 1     | 0.10% 0.10%        |
| Plasmodium falciparum    |                                                            |       |                    |
| 1                        | cellular process (GO:0009987)                              | 275   | 51.60% 37.60%      |
| 2                        | metabolic process (GO:0008152)                             | 251   | 47.10% 34.30%      |

**Supplementary table 1.**

Sheet1

|                                                              |     |        |        |
|--------------------------------------------------------------|-----|--------|--------|
| 3 cellular component organization or biogenesis (GO:0071840) | 103 | 19.30% | 14.10% |
| 4 localization (GO:0051179)                                  | 54  | 10.10% | 7.40%  |
| 5 response to stimulus (GO:0050896)                          | 24  | 4.50%  | 3.30%  |
| 6 biological regulation (GO:0065007)                         | 17  | 3.20%  | 2.30%  |
| 7 reproduction (GO:0000003)                                  | 4   | 0.80%  | 0.50%  |
| 8 locomotion (GO:0040011)                                    | 2   | 0.40%  | 0.30%  |
| 9 developmental process (GO:0032502)                         | 1   | 0.20%  | 0.10%  |

Supplementary table 1.

| Cellular Component       |                                     |       |            |         |
|--------------------------|-------------------------------------|-------|------------|---------|
| #                        | GO Term                             | Count | % Proteins | % Terms |
| Homo sapiens             |                                     |       |            |         |
| 1                        | cell part (GO:0044464)              | 1248  | 38.10%     | 38.90%  |
| 2                        | organelle (GO:0043226)              | 976   | 29.80%     | 30.40%  |
| 3                        | macromolecular complex (GO:0032991) | 553   | 16.90%     | 17.20%  |
| 4                        | membrane (GO:0016020)               | 295   | 9.00%      | 9.20%   |
| 5                        | extracellular region (GO:0005576)   | 60    | 1.80%      | 1.90%   |
| 6                        | cell junction (GO:0030054)          | 31    | 0.90%      | 1.00%   |
| 7                        | synapse (GO:0045202)                | 29    | 0.90%      | 0.90%   |
| 8                        | extracellular matrix (GO:0031012)   | 16    | 0.50%      | 0.50%   |
| Arabidopsis thaliana     |                                     |       |            |         |
| 1                        | cell part (GO:0044464)              | 936   | 36.20%     | 42.00%  |
| 2                        | organelle (GO:0043226)              | 712   | 27.50%     | 32.00%  |
| 3                        | macromolecular complex (GO:0032991) | 450   | 17.40%     | 20.20%  |
| 4                        | membrane (GO:0016020)               | 118   | 4.60%      | 5.30%   |
| 5                        | extracellular region (GO:0005576)   | 9     | 0.30%      | 0.40%   |
| 6                        | nucleoid (GO:0009295)               | 1     | 0.00%      | 0.00%   |
| 7                        | cell junction (GO:0030054)          | 1     | 0.00%      | 0.00%   |
| Saccharomyces cerevisiae |                                     |       |            |         |
| 1                        | cell part (GO:0044464)              | 484   | 55.60%     | 40.20%  |
| 2                        | organelle (GO:0043226)              | 365   | 41.90%     | 30.30%  |
| 3                        | macromolecular complex (GO:0032991) | 294   | 33.80%     | 24.40%  |
| 4                        | membrane (GO:0016020)               | 61    | 7.00%      | 5.10%   |
| 5                        | extracellular region (GO:0005576)   | 1     | 0.10%      | 0.10%   |
| Plasmodium falciparum    |                                     |       |            |         |
| 1                        | cell part (GO:0044464)              | 243   | 45.60%     | 39.60%  |
| 2                        | organelle (GO:0043226)              | 189   | 35.50%     | 30.80%  |
| 3                        | macromolecular complex (GO:0032991) | 152   | 28.50%     | 24.80%  |
| 4                        | membrane (GO:0016020)               | 27    | 5.10%      | 4.40%   |
| 5                        | extracellular region (GO:0005576)   | 3     | 0.60%      | 0.50%   |

Supplementary table 1.

| Protein Class        |                                                             |       |            |         |
|----------------------|-------------------------------------------------------------|-------|------------|---------|
| #                    | GO Term                                                     | Count | % Proteins | % Terms |
| Homo sapiens         |                                                             |       |            |         |
| 1                    | nucleic acid binding (PC00171)                              | 529   | 16.20%     | 24.30%  |
| 2                    | transcription factor (PC00218)                              | 367   | 11.20%     | 16.90%  |
| 3                    | hydrolase (PC00121)                                         | 209   | 6.40%      | 9.60%   |
| 4                    | enzyme modulator (PC00095)                                  | 178   | 5.40%      | 8.20%   |
| 5                    | cytoskeletal protein (PC00085)                              | 129   | 3.90%      | 5.90%   |
| 6                    | transferase (PC00220)                                       | 122   | 3.70%      | 5.60%   |
| 7                    | membrane traffic protein (PC00150)                          | 87    | 2.70%      | 4.00%   |
| 8                    | signaling molecule (PC00207)                                | 79    | 2.40%      | 3.60%   |
| 9                    | transporter (PC00227)                                       | 55    | 1.70%      | 2.50%   |
| 10                   | receptor (PC00197)                                          | 53    | 1.60%      | 2.40%   |
| 11                   | ligase (PC00142)                                            | 47    | 1.40%      | 2.20%   |
| 12                   | transfer/carrier protein (PC00219)                          | 45    | 1.40%      | 2.10%   |
| 13                   | calcium-binding protein (PC00060)                           | 40    | 1.20%      | 1.80%   |
| 14                   | chaperone (PC00072)                                         | 31    | 0.90%      | 1.40%   |
| 15                   | oxidoreductase (PC00176)                                    | 29    | 0.90%      | 1.30%   |
| 16                   | cell adhesion molecule (PC00069)                            | 29    | 0.90%      | 1.30%   |
| 17                   | transmembrane receptor regulatory/adaptor protein (PC00217) | 27    | 0.80%      | 1.20%   |
| 18                   | defense/immunity protein (PC00090)                          | 26    | 0.80%      | 1.20%   |
| 19                   | cell junction protein (PC00070)                             | 26    | 0.80%      | 1.20%   |
| 20                   | extracellular matrix protein (PC00102)                      | 22    | 0.70%      | 1.00%   |
| 21                   | structural protein (PC00211)                                | 16    | 0.50%      | 0.70%   |
| 22                   | isomerase (PC00135)                                         | 15    | 0.50%      | 0.70%   |
| 23                   | lyase (PC00144)                                             | 11    | 0.30%      | 0.50%   |
| 24                   | viral protein (PC00237)                                     | 1     | 0.00%      | 0.00%   |
| 25                   | surfactant (PC00212)                                        | 1     | 0.00%      | 0.00%   |
| Arabidopsis thaliana |                                                             |       |            |         |
| 1                    | nucleic acid binding (PC00171)                              | 403   | 15.60%     | 32.10%  |
| 2                    | hydrolase (PC00121)                                         | 175   | 6.80%      | 13.90%  |
| 3                    | transferase (PC00220)                                       | 112   | 4.30%      | 8.90%   |
| 4                    | transcription factor (PC00218)                              | 97    | 3.70%      | 7.70%   |
| 5                    | oxidoreductase (PC00176)                                    | 64    | 2.50%      | 5.10%   |
| 6                    | enzyme modulator (PC00095)                                  | 63    | 2.40%      | 5.00%   |
| 7                    | cytoskeletal protein (PC00085)                              | 56    | 2.20%      | 4.50%   |
| 8                    | transporter (PC00227)                                       | 45    | 1.70%      | 3.60%   |
| 9                    | membrane traffic protein (PC00150)                          | 41    | 1.60%      | 3.30%   |
| 10                   | lyase (PC00144)                                             | 39    | 1.50%      | 3.10%   |
| 11                   | ligase (PC00142)                                            | 36    | 1.40%      | 2.90%   |

**Supplementary table 1.**

|                                                                |     |        |        |
|----------------------------------------------------------------|-----|--------|--------|
| 12 isomerase (PC00135)                                         | 30  | 1.20%  | 2.40%  |
| 13 chaperone (PC00072)                                         | 22  | 0.90%  | 1.80%  |
| 14 transfer/carrier protein (PC00219)                          | 19  | 0.70%  | 1.50%  |
| 15 calcium-binding protein (PC00060)                           | 17  | 0.70%  | 1.40%  |
| 16 defense/immunity protein (PC00090)                          | 7   | 0.30%  | 0.60%  |
| 17 signaling molecule (PC00207)                                | 6   | 0.20%  | 0.50%  |
| 18 structural protein (PC00211)                                | 6   | 0.20%  | 0.50%  |
| 19 receptor (PC00197)                                          | 6   | 0.20%  | 0.50%  |
| 20 extracellular matrix protein (PC00102)                      | 3   | 0.10%  | 0.20%  |
| 21 transmembrane receptor regulatory/adaptor protein (PC00021) | 3   | 0.10%  | 0.20%  |
| 22 cell adhesion molecule (PC00069)                            | 3   | 0.10%  | 0.20%  |
| 23 storage protein (PC00210)                                   | 2   | 0.10%  | 0.20%  |
| <b>Saccharomyces cerevisiae</b>                                |     |        |        |
| 1 nucleic acid binding (PC00171)                               | 227 | 26.10% | 37.50% |
| 2 hydrolase (PC00121)                                          | 68  | 7.80%  | 11.20% |
| 3 transferase (PC00220)                                        | 50  | 5.70%  | 8.30%  |
| 4 enzyme modulator (PC00095)                                   | 44  | 5.10%  | 7.30%  |
| 5 transcription factor (PC00218)                               | 39  | 4.50%  | 6.40%  |
| 6 transporter (PC00227)                                        | 25  | 2.90%  | 4.10%  |
| 7 ligase (PC00142)                                             | 23  | 2.60%  | 3.80%  |
| 8 membrane traffic protein (PC00150)                           | 22  | 2.50%  | 3.60%  |
| 9 cytoskeletal protein (PC00085)                               | 20  | 2.30%  | 3.30%  |
| 10 oxidoreductase (PC00176)                                    | 20  | 2.30%  | 3.30%  |
| 11 lyase (PC00144)                                             | 14  | 1.60%  | 2.30%  |
| 12 transfer/carrier protein (PC00219)                          | 13  | 1.50%  | 2.10%  |
| 13 chaperone (PC00072)                                         | 10  | 1.10%  | 1.70%  |
| 14 calcium-binding protein (PC00060)                           | 7   | 0.80%  | 1.20%  |
| 15 isomerase (PC00135)                                         | 7   | 0.80%  | 1.20%  |
| 16 signaling molecule (PC00207)                                | 5   | 0.60%  | 0.80%  |
| 17 cell junction protein (PC00070)                             | 4   | 0.50%  | 0.70%  |
| 18 receptor (PC00197)                                          | 4   | 0.50%  | 0.70%  |
| 19 defense/immunity protein (PC00090)                          | 1   | 0.10%  | 0.20%  |
| 20 structural protein (PC00211)                                | 1   | 0.10%  | 0.20%  |
| 21 storage protein (PC00210)                                   | 1   | 0.10%  | 0.20%  |
| <b>Plasmodium falciparum</b>                                   |     |        |        |
| 1 nucleic acid binding (PC00171)                               | 143 | 26.80% | 37.40% |
| 2 hydrolase (PC00121)                                          | 48  | 9.00%  | 12.60% |
| 3 enzyme modulator (PC00095)                                   | 34  | 6.40%  | 8.90%  |
| 4 transferase (PC00220)                                        | 28  | 5.30%  | 7.30%  |
| 5 cytoskeletal protein (PC00085)                               | 18  | 3.40%  | 4.70%  |

**Supplementary table 1.**

Sheet1

|                                                                |    |       |       |
|----------------------------------------------------------------|----|-------|-------|
| 6 ligase (PC00142)                                             | 17 | 3.20% | 4.50% |
| 7 membrane traffic protein (PC00150)                           | 15 | 2.80% | 3.90% |
| 8 transporter (PC00227)                                        | 14 | 2.60% | 3.70% |
| 9 transcription factor (PC00218)                               | 13 | 2.40% | 3.40% |
| 10 calcium-binding protein (PC00060)                           | 8  | 1.50% | 2.10% |
| 11 transfer/carrier protein (PC00219)                          | 8  | 1.50% | 2.10% |
| 12 chaperone (PC00072)                                         | 8  | 1.50% | 2.10% |
| 13 isomerase (PC00135)                                         | 8  | 1.50% | 2.10% |
| 14 oxidoreductase (PC00176)                                    | 5  | 0.90% | 1.30% |
| 15 lyase (PC00144)                                             | 3  | 0.60% | 0.80% |
| 16 extracellular matrix protein (PC00102)                      | 2  | 0.40% | 0.50% |
| 17 signaling molecule (PC00207)                                | 2  | 0.40% | 0.50% |
| 18 cell junction protein (PC00070)                             | 2  | 0.40% | 0.50% |
| 19 structural protein (PC00211)                                | 2  | 0.40% | 0.50% |
| 20 receptor (PC00197)                                          | 2  | 0.40% | 0.50% |
| 21 transmembrane receptor regulatory/adaptor protein (PC00090) | 1  | 0.20% | 0.30% |
| 22 defense/immunity protein (PC00090)                          | 1  | 0.20% | 0.30% |



Supplementary table 1.

| #            | GO Term                                                                                    | Pathway | Count | % Proteins | % Term |
|--------------|--------------------------------------------------------------------------------------------|---------|-------|------------|--------|
| Homo sapiens |                                                                                            |         |       |            |        |
| 1            | Wnt signaling pathway (P00057)                                                             |         | 75    | 2.30%      | 6.90%  |
| 2            | Gonadotropin-releasing hormone receptor pathway (P06664)                                   |         | 64    | 2.00%      | 5.90%  |
| 3            | Integrin signalling pathway (P00034)                                                       |         | 40    | 1.20%      | 3.70%  |
| 4            | PDGF signaling pathway (P00047)                                                            |         | 38    | 1.20%      | 3.50%  |
| 5            | CCKR signaling map (P06959)                                                                |         | 37    | 1.10%      | 3.40%  |
| 6            | Inflammation mediated by chemokine and cytokine signaling pathway (P00031)                 |         | 36    | 1.10%      | 3.30%  |
| 7            | Angiogenesis (P00005)                                                                      |         | 35    | 1.10%      | 3.20%  |
| 8            | Alzheimer disease-presenilin pathway (P00004)                                              |         | 30    | 0.90%      | 2.80%  |
| 9            | Cadherin signaling pathway (P00012)                                                        |         | 30    | 0.90%      | 2.80%  |
| 10           | Huntington disease (P00029)                                                                |         | 26    | 0.80%      | 2.40%  |
| 11           | FGF signaling pathway (P00021)                                                             |         | 25    | 0.80%      | 2.30%  |
| 12           | EGF receptor signaling pathway (P00018)                                                    |         | 25    | 0.80%      | 2.30%  |
| 13           | Apoptosis signaling pathway (P00006)                                                       |         | 23    | 0.70%      | 2.10%  |
| 14           | Transcription regulation by bZIP transcription factor (P00055)                             |         | 20    | 0.60%      | 1.90%  |
| 15           | TGF-beta signaling pathway (P00052)                                                        |         | 20    | 0.60%      | 1.90%  |
| 16           | Heterotrimeric G-protein signaling pathway-Gq alpha and Go alpha mediated pathway (P00017) |         | 18    | 0.50%      | 1.70%  |
| 17           | T cell activation (P00053)                                                                 |         | 17    | 0.50%      | 1.60%  |
| 18           | Cytoskeletal regulation by Rho GTPase (P00016)                                             |         | 17    | 0.50%      | 1.60%  |
| 19           | p53 pathway (P00059)                                                                       |         | 16    | 0.50%      | 1.50%  |
| 20           | Parkinson disease (P00049)                                                                 |         | 16    | 0.50%      | 1.50%  |
| 21           | General transcription regulation (P00023)                                                  |         | 15    | 0.50%      | 1.40%  |
| 22           | Endothelin signaling pathway (P00019)                                                      |         | 15    | 0.50%      | 1.40%  |
| 23           | B cell activation (P00010)                                                                 |         | 15    | 0.50%      | 1.40%  |
| 24           | VEGF signaling pathway (P00056)                                                            |         | 14    | 0.40%      | 1.30%  |
| 25           | Interleukin signaling pathway (P00036)                                                     |         | 14    | 0.40%      | 1.30%  |
| 26           | Alzheimer disease-amyloid secretase pathway (P00003)                                       |         | 13    | 0.40%      | 1.20%  |
| 27           | p53 pathway feedback loops 2 (P04398)                                                      |         | 13    | 0.40%      | 1.20%  |
| 28           | Heterotrimeric G-protein signaling pathway-Gi alpha and Gs alpha mediated pathway (P00018) |         | 13    | 0.40%      | 1.20%  |
| 29           | Toll receptor signaling pathway (P00054)                                                   |         | 12    | 0.40%      | 1.10%  |
| 30           | Nicotinic acetylcholine receptor signaling pathway (P00044)                                |         | 12    | 0.40%      | 1.10%  |
| 31           | Ras Pathway (P04393)                                                                       |         | 11    | 0.30%      | 1.00%  |
| 32           | Muscarinic acetylcholine receptor 1 and 3 signaling pathway (P00042)                       |         | 10    | 0.30%      | 0.90%  |
| 33           | Insulin/IGF pathway-protein kinase B signaling cascade (P00033)                            |         | 10    | 0.30%      | 0.90%  |
| 34           | Axon guidance mediated by netrin (P00009)                                                  |         | 9     | 0.30%      | 0.80%  |
| 35           | Ubiquitin proteasome pathway (P00060)                                                      |         | 9     | 0.30%      | 0.80%  |
| 36           | Hypoxia response via HIF activation (P00030)                                               |         | 9     | 0.30%      | 0.80%  |
| 37           | 5HT2 type receptor mediated signaling pathway (P04374)                                     |         | 9     | 0.30%      | 0.80%  |

**Supplementary table 1.**

|                                                                                           |   |       |       |
|-------------------------------------------------------------------------------------------|---|-------|-------|
| 38 Oxidative stress response (P00046)                                                     | 8 | 0.20% | 0.70% |
| 39 Notch signaling pathway (P00045)                                                       | 8 | 0.20% | 0.70% |
| 40 Thyrotropin-releasing hormone receptor signaling pathway (P04394)                      | 8 | 0.20% | 0.70% |
| 41 p38 MAPK pathway (P05918)                                                              | 8 | 0.20% | 0.70% |
| 42 DNA replication (P00017)                                                               | 8 | 0.20% | 0.70% |
| 43 Synaptic vesicle trafficking (P05734)                                                  | 7 | 0.20% | 0.60% |
| 44 Ionotropic glutamate receptor pathway (P00037)                                         | 7 | 0.20% | 0.60% |
| 45 Interferon-gamma signaling pathway (P00035)                                            | 7 | 0.20% | 0.60% |
| 46 Oxytocin receptor mediated signaling pathway (P04391)                                  | 7 | 0.20% | 0.60% |
| 47 Histamine H1 receptor mediated signaling pathway (P04385)                              | 7 | 0.20% | 0.60% |
| 48 PI3 kinase pathway (P00048)                                                            | 6 | 0.20% | 0.60% |
| 49 Hedgehog signaling pathway (P00025)                                                    | 6 | 0.20% | 0.60% |
| 50 Angiotensin II-stimulated signaling through G proteins and beta-arrestin (P05911)      | 6 | 0.20% | 0.60% |
| 51 Circadian clock system (P00015)                                                        | 6 | 0.20% | 0.60% |
| 52 Cell cycle (P00013)                                                                    | 6 | 0.20% | 0.60% |
| 53 Axon guidance mediated by Slit/Robo (P00008)                                           | 5 | 0.20% | 0.50% |
| 54 Alpha adrenergic receptor signaling pathway (P00002)                                   | 5 | 0.20% | 0.50% |
| 55 mRNA splicing (P00058)                                                                 | 5 | 0.20% | 0.50% |
| 56 GABA-B receptor II signaling (P05731)                                                  | 5 | 0.20% | 0.50% |
| 57 Insulin/IGF pathway-mitogen activated protein kinase kinase/MAP kinase cascade (P0003) | 5 | 0.20% | 0.50% |
| 58 Nicotine pharmacodynamics pathway (P06587)                                             | 5 | 0.20% | 0.50% |
| 59 Blood coagulation (P00011)                                                             | 5 | 0.20% | 0.50% |
| 60 Beta2 adrenergic receptor signaling pathway (P04378)                                   | 5 | 0.20% | 0.50% |
| 61 Beta1 adrenergic receptor signaling pathway (P04377)                                   | 5 | 0.20% | 0.50% |
| 62 TCA cycle (P00051)                                                                     | 4 | 0.10% | 0.40% |
| 63 De novo pyrimidine ribonucleotides biosynthesis (P02740)                               | 4 | 0.10% | 0.40% |
| 64 Metabotropic glutamate receptor group II pathway (P00040)                              | 4 | 0.10% | 0.40% |
| 65 Metabotropic glutamate receptor group III pathway (P00039)                             | 4 | 0.10% | 0.40% |
| 66 Vasopressin synthesis (P04395)                                                         | 4 | 0.10% | 0.40% |
| 67 P53 pathway feedback loops 1 (P04392)                                                  | 4 | 0.10% | 0.40% |
| 68 Opioid proopiomelanocortin pathway (P05917)                                            | 4 | 0.10% | 0.40% |
| 69 Opioid proenkephalin pathway (P05915)                                                  | 4 | 0.10% | 0.40% |
| 70 Dopamine receptor mediated signaling pathway (P05912)                                  | 4 | 0.10% | 0.40% |
| 71 Adrenaline and noradrenaline biosynthesis (P00001)                                     | 3 | 0.10% | 0.30% |
| 72 Heme biosynthesis (P02746)                                                             | 3 | 0.10% | 0.30% |
| 73 Plasminogen activating cascade (P00050)                                                | 3 | 0.10% | 0.30% |
| 74 Muscarinic acetylcholine receptor 2 and 4 signaling pathway (P00043)                   | 3 | 0.10% | 0.30% |
| 75 Metabotropic glutamate receptor group I pathway (P00041)                               | 3 | 0.10% | 0.30% |
| 76 Endogenous cannabinoid signaling (P05730)                                              | 3 | 0.10% | 0.30% |
| 77 JAK/STAT signaling pathway (P00038)                                                    | 3 | 0.10% | 0.30% |

**Supplementary table 1.**

|                                                                       |   |       |       |
|-----------------------------------------------------------------------|---|-------|-------|
| 78 p53 pathway by glucose deprivation (P04397)                        | 3 | 0.10% | 0.30% |
| 79 General transcription by RNA polymerase I (P00022)                 | 3 | 0.10% | 0.30% |
| 80 Pyruvate metabolism (P02772)                                       | 3 | 0.10% | 0.30% |
| 81 Corticotropin releasing factor receptor signaling pathway (P04380) | 3 | 0.10% | 0.30% |
| 82 5HT4 type receptor mediated signaling pathway (P04376)             | 3 | 0.10% | 0.30% |
| 83 5HT3 type receptor mediated signaling pathway (P04375)             | 3 | 0.10% | 0.30% |
| 84 5HT1 type receptor mediated signaling pathway (P04373)             | 3 | 0.10% | 0.30% |
| 85 Axon guidance mediated by semaphorins (P00007)                     | 2 | 0.10% | 0.20% |
| 86 Methylmalonyl pathway (P02755)                                     | 2 | 0.10% | 0.20% |
| 87 Isoleucine biosynthesis (P02748)                                   | 2 | 0.10% | 0.20% |
| 88 De novo purine biosynthesis (P02738)                               | 2 | 0.10% | 0.20% |
| 89 ATP synthesis (P02721)                                             | 2 | 0.10% | 0.20% |
| 90 Vitamin D metabolism and pathway (P04396)                          | 2 | 0.10% | 0.20% |
| 91 Glycolysis (P00024)                                                | 2 | 0.10% | 0.20% |
| 92 Succinate to proprionate conversion (P02777)                       | 2 | 0.10% | 0.20% |
| 93 FAS signaling pathway (P00020)                                     | 2 | 0.10% | 0.20% |
| 94 5-Hydroxytryptamine degradation (P04372)                           | 2 | 0.10% | 0.20% |
| 95 SCW signaling pathway (P06216)                                     | 1 | 0.00% | 0.10% |
| 96 GBB signaling pathway (P06214)                                     | 1 | 0.00% | 0.10% |
| 97 DPP signaling pathway (P06213)                                     | 1 | 0.00% | 0.10% |
| 98 DPP-SCW signaling pathway (P06212)                                 | 1 | 0.00% | 0.10% |
| 99 BMP/activin signaling pathway-drosophila (P06211)                  | 1 | 0.00% | 0.10% |
| 100 Pyridoxal-5-phosphate biosynthesis (P02759)                       | 1 | 0.00% | 0.10% |
| 101 Mannose metabolism (P02752)                                       | 1 | 0.00% | 0.10% |
| 102 Lipoate_biosynthesis (P02750)                                     | 1 | 0.00% | 0.10% |
| 103 Fructose galactose metabolism (P02744)                            | 1 | 0.00% | 0.10% |
| 104 De novo pyrimidine deoxyribonucleotide biosynthesis (P02739)      | 1 | 0.00% | 0.10% |
| 105 Cysteine biosynthesis (P02737)                                    | 1 | 0.00% | 0.10% |
| 106 Arginine biosynthesis (P02728)                                    | 1 | 0.00% | 0.10% |
| 107 Vitamin B6 metabolism (P02787)                                    | 1 | 0.00% | 0.10% |
| 108 Valine biosynthesis (P02785)                                      | 1 | 0.00% | 0.10% |
| 109 Anandamide degradation (P05728)                                   | 1 | 0.00% | 0.10% |
| 110 Opioid prodynorphin pathway (P05916)                              | 1 | 0.00% | 0.10% |
| 111 Salvage pyrimidine ribonucleotides (P02775)                       | 1 | 0.00% | 0.10% |
| 112 Enkephalin release (P05913)                                       | 1 | 0.00% | 0.10% |
| 113 Pyridoxal phosphate salvage pathway (P02770)                      | 1 | 0.00% | 0.10% |
| 114 Proline biosynthesis (P02768)                                     | 1 | 0.00% | 0.10% |
| 115 Beta3 adrenergic receptor signaling pathway (P04379)              | 1 | 0.00% | 0.10% |
| 116 Pentose phosphate pathway (P02762)                                | 1 | 0.00% | 0.10% |

Arabidopsis thaliana

**Supplementary table 1.**

|                                                                                           |    |       |       |
|-------------------------------------------------------------------------------------------|----|-------|-------|
| 1 General transcription regulation (P00023)                                               | 17 | 0.70% | 5.50% |
| 2 Transcription regulation by bZIP transcription factor (P00055)                          | 16 | 0.60% | 5.20% |
| 3 Ubiquitin proteasome pathway (P00060)                                                   | 10 | 0.40% | 3.30% |
| 4 Huntington disease (P00029)                                                             | 9  | 0.30% | 2.90% |
| 5 PDGF signaling pathway (P00047)                                                         | 8  | 0.30% | 2.60% |
| 6 DNA replication (P00017)                                                                | 8  | 0.30% | 2.60% |
| 7 Wnt signaling pathway (P00057)                                                          | 7  | 0.30% | 2.30% |
| 8 Parkinson disease (P00049)                                                              | 7  | 0.30% | 2.30% |
| 9 De novo purine biosynthesis (P02738)                                                    | 7  | 0.30% | 2.30% |
| 10 Nicotinic acetylcholine receptor signaling pathway (P00044)                            | 7  | 0.30% | 2.30% |
| 11 Ras Pathway (P04393)                                                                   | 7  | 0.30% | 2.30% |
| 12 EGF receptor signaling pathway (P00018)                                                | 7  | 0.30% | 2.30% |
| 13 Adrenaline and noradrenaline biosynthesis (P00001)                                     | 6  | 0.20% | 2.00% |
| 14 Histidine biosynthesis (P02747)                                                        | 6  | 0.20% | 2.00% |
| 15 Heme biosynthesis (P02746)                                                             | 6  | 0.20% | 2.00% |
| 16 Muscarinic acetylcholine receptor 2 and 4 signaling pathway (P00043)                   | 6  | 0.20% | 2.00% |
| 17 Insulin/IGF pathway-mitogen activated protein kinase kinase/MAP kinase cascade (P0003) | 6  | 0.20% | 2.00% |
| 18 Gonadotropin-releasing hormone receptor pathway (P06664)                               | 5  | 0.20% | 1.60% |
| 19 Interleukin signaling pathway (P00036)                                                 | 5  | 0.20% | 1.60% |
| 20 Inflammation mediated by chemokine and cytokine signaling pathway (P00031)             | 5  | 0.20% | 1.60% |
| 21 TCA cycle (P00051)                                                                     | 4  | 0.20% | 1.30% |
| 22 Oxidative stress response (P00046)                                                     | 4  | 0.20% | 1.30% |
| 23 Ionotropic glutamate receptor pathway (P00037)                                         | 4  | 0.20% | 1.30% |
| 24 Tryptophan biosynthesis (P02783)                                                       | 4  | 0.20% | 1.30% |
| 25 FGF signaling pathway (P00021)                                                         | 4  | 0.20% | 1.30% |
| 26 FAS signaling pathway (P00020)                                                         | 4  | 0.20% | 1.30% |
| 27 S-adenosylmethionine biosynthesis (P02773)                                             | 4  | 0.20% | 1.30% |
| 28 p53 pathway (P00059)                                                                   | 3  | 0.10% | 1.00% |
| 29 De novo pyrimidine ribonucleotides biosynthesis (P02740)                               | 3  | 0.10% | 1.00% |
| 30 Muscarinic acetylcholine receptor 1 and 3 signaling pathway (P00042)                   | 3  | 0.10% | 1.00% |
| 31 Metabotropic glutamate receptor group II pathway (P00040)                              | 3  | 0.10% | 1.00% |
| 32 Arginine biosynthesis (P02728)                                                         | 3  | 0.10% | 1.00% |
| 33 Metabotropic glutamate receptor group III pathway (P00039)                             | 3  | 0.10% | 1.00% |
| 34 Integrin signalling pathway (P00034)                                                   | 3  | 0.10% | 1.00% |
| 35 Thyrotropin-releasing hormone receptor signaling pathway (P04394)                      | 3  | 0.10% | 1.00% |
| 36 Oxytocin receptor mediated signaling pathway (P04391)                                  | 3  | 0.10% | 1.00% |
| 37 p38 MAPK pathway (P05918)                                                              | 3  | 0.10% | 1.00% |
| 38 Opioid proopiomelanocortin pathway (P05917)                                            | 3  | 0.10% | 1.00% |
| 39 Opioid prodynorphin pathway (P05916)                                                   | 3  | 0.10% | 1.00% |
| 40 Opioid proenkephalin pathway (P05915)                                                  | 3  | 0.10% | 1.00% |

**Supplementary table 1.**

|                                                                       |   |       |       |
|-----------------------------------------------------------------------|---|-------|-------|
| 41 Dopamine receptor mediated signaling pathway (P05912)              | 3 | 0.10% | 1.00% |
| 42 Pyruvate metabolism (P02772)                                       | 3 | 0.10% | 1.00% |
| 43 Corticotropin releasing factor receptor signaling pathway (P04380) | 3 | 0.10% | 1.00% |
| 44 Beta3 adrenergic receptor signaling pathway (P04379)               | 3 | 0.10% | 1.00% |
| 45 Beta2 adrenergic receptor signaling pathway (P04378)               | 3 | 0.10% | 1.00% |
| 46 Beta1 adrenergic receptor signaling pathway (P04377)               | 3 | 0.10% | 1.00% |
| 47 5HT4 type receptor mediated signaling pathway (P04376)             | 3 | 0.10% | 1.00% |
| 48 5HT3 type receptor mediated signaling pathway (P04375)             | 3 | 0.10% | 1.00% |
| 49 5HT2 type receptor mediated signaling pathway (P04374)             | 3 | 0.10% | 1.00% |
| 50 5HT1 type receptor mediated signaling pathway (P04373)             | 3 | 0.10% | 1.00% |
| 51 Apoptosis signaling pathway (P00006)                               | 2 | 0.10% | 0.70% |
| 52 O-antigen biosynthesis (P02757)                                    | 2 | 0.10% | 0.70% |
| 53 Methionine biosynthesis (P02753)                                   | 2 | 0.10% | 0.70% |
| 54 CCKR signaling map (P06959)                                        | 2 | 0.10% | 0.70% |
| 55 Lysine biosynthesis (P02751)                                       | 2 | 0.10% | 0.70% |
| 56 Fructose galactose metabolism (P02744)                             | 2 | 0.10% | 0.70% |
| 57 TGF-beta signaling pathway (P00052)                                | 2 | 0.10% | 0.70% |
| 58 PI3 kinase pathway (P00048)                                        | 2 | 0.10% | 0.70% |
| 59 Adenine and hypoxanthine salvage pathway (P02723)                  | 2 | 0.10% | 0.70% |
| 60 Insulin/IGF pathway-protein kinase B signaling cascade (P00033)    | 2 | 0.10% | 0.70% |
| 61 p53 pathway feedback loops 2 (P04398)                              | 2 | 0.10% | 0.70% |
| 62 Vitamin D metabolism and pathway (P04396)                          | 2 | 0.10% | 0.70% |
| 63 General transcription by RNA polymerase I (P00022)                 | 2 | 0.10% | 0.70% |
| 64 Pentose phosphate pathway (P02762)                                 | 2 | 0.10% | 0.70% |
| 65 Pyridoxal-5-phosphate biosynthesis (P02759)                        | 1 | 0.00% | 0.30% |
| 66 N-acetylglucosamine metabolism (P02756)                            | 1 | 0.00% | 0.30% |
| 67 Methylmalonyl pathway (P02755)                                     | 1 | 0.00% | 0.30% |
| 68 Isoleucine biosynthesis (P02748)                                   | 1 | 0.00% | 0.30% |
| 69 mRNA splicing (P00058)                                             | 1 | 0.00% | 0.30% |
| 70 Glutamine glutamate conversion (P02745)                            | 1 | 0.00% | 0.30% |
| 71 Notch signaling pathway (P00045)                                   | 1 | 0.00% | 0.30% |
| 72 Chorismate biosynthesis (P02734)                                   | 1 | 0.00% | 0.30% |
| 73 Biotin biosynthesis (P02731)                                       | 1 | 0.00% | 0.30% |
| 74 Synaptic vesicle trafficking (P05734)                              | 1 | 0.00% | 0.30% |
| 75 Ascorbate degradation (P02729)                                     | 1 | 0.00% | 0.30% |
| 76 Allantoin degradation (P02725)                                     | 1 | 0.00% | 0.30% |
| 77 Interferon-gamma signaling pathway (P00035)                        | 1 | 0.00% | 0.30% |
| 78 Vitamin B6 metabolism (P02787)                                     | 1 | 0.00% | 0.30% |
| 79 Valine biosynthesis (P02785)                                       | 1 | 0.00% | 0.30% |
| 80 Hypoxia response via HIF activation (P00030)                       | 1 | 0.00% | 0.30% |

**Supplementary table 1.**

|                                                                         |    |       |       |
|-------------------------------------------------------------------------|----|-------|-------|
| 81 Hedgehog signaling pathway (P00025)                                  | 1  | 0.00% | 0.30% |
| 82 Succinate to propionate conversion (P02777)                          | 1  | 0.00% | 0.30% |
| 83 Serine glycine biosynthesis (P02776)                                 | 1  | 0.00% | 0.30% |
| 84 Salvage pyrimidine ribonucleotides (P02775)                          | 1  | 0.00% | 0.30% |
| 85 Pyrimidine Metabolism (P02771)                                       | 1  | 0.00% | 0.30% |
| 86 Pyridoxal phosphate salvage pathway (P02770)                         | 1  | 0.00% | 0.30% |
| 87 Circadian clock system (P00015)                                      | 1  | 0.00% | 0.30% |
| 88 Cell cycle (P00013)                                                  | 1  | 0.00% | 0.30% |
| 89 Phenylethylamine degradation (P02766)                                | 1  | 0.00% | 0.30% |
| 90 Peptidoglycan biosynthesis (P02763)                                  | 1  | 0.00% | 0.30% |
| 91 5-Hydroxytryptamine degradation (P04372)                             | 1  | 0.00% | 0.30% |
| <b>Saccharomyces cerevisiae</b>                                         |    |       |       |
| 1 Transcription regulation by bZIP transcription factor (P00055)        | 16 | 1.80% | 8.00% |
| 2 General transcription regulation (P00023)                             | 15 | 1.70% | 7.50% |
| 3 Parkinson disease (P00049)                                            | 14 | 1.60% | 7.00% |
| 4 Ubiquitin proteasome pathway (P00060)                                 | 13 | 1.50% | 6.50% |
| 5 Apoptosis signaling pathway (P00006)                                  | 10 | 1.10% | 5.00% |
| 6 Wnt signaling pathway (P00057)                                        | 10 | 1.10% | 5.00% |
| 7 Nicotinic acetylcholine receptor signaling pathway (P00044)           | 7  | 0.80% | 3.50% |
| 8 Glycolysis (P00024)                                                   | 6  | 0.70% | 3.00% |
| 9 De novo purine biosynthesis (P02738)                                  | 5  | 0.60% | 2.50% |
| 10 TCA cycle (P00051)                                                   | 4  | 0.50% | 2.00% |
| 11 EGF receptor signaling pathway (P00018)                              | 4  | 0.50% | 2.00% |
| 12 DNA replication (P00017)                                             | 4  | 0.50% | 2.00% |
| 13 Isoleucine biosynthesis (P02748)                                     | 3  | 0.30% | 1.50% |
| 14 Heme biosynthesis (P02746)                                           | 3  | 0.30% | 1.50% |
| 15 PDGF signaling pathway (P00047)                                      | 3  | 0.30% | 1.50% |
| 16 Muscarinic acetylcholine receptor 2 and 4 signaling pathway (P00043) | 3  | 0.30% | 1.50% |
| 17 Muscarinic acetylcholine receptor 1 and 3 signaling pathway (P00042) | 3  | 0.30% | 1.50% |
| 18 Metabotropic glutamate receptor group II pathway (P00040)            | 3  | 0.30% | 1.50% |
| 19 ATP synthesis (P02721)                                               | 3  | 0.30% | 1.50% |
| 20 Valine biosynthesis (P02785)                                         | 3  | 0.30% | 1.50% |
| 21 Huntington disease (P00029)                                          | 3  | 0.30% | 1.50% |
| 22 FGF signaling pathway (P00021)                                       | 3  | 0.30% | 1.50% |
| 23 CCKR signaling map (P06959)                                          | 2  | 0.20% | 1.00% |
| 24 Leucine biosynthesis (P02749)                                        | 2  | 0.20% | 1.00% |
| 25 Toll receptor signaling pathway (P00054)                             | 2  | 0.20% | 1.00% |
| 26 De novo pyrimidine ribonucleotides biosynthesis (P02740)             | 2  | 0.20% | 1.00% |
| 27 Arginine biosynthesis (P02728)                                       | 2  | 0.20% | 1.00% |
| 28 Tryptophan biosynthesis (P02783)                                     | 2  | 0.20% | 1.00% |

**Supplementary table 1.**

|                                                                                               |   |       |       |
|-----------------------------------------------------------------------------------------------|---|-------|-------|
| 29 Endothelin signaling pathway (P00019)                                                      | 2 | 0.20% | 1.00% |
| 30 Cell cycle (P00013)                                                                        | 2 | 0.20% | 1.00% |
| 31 B cell activation (P00010)                                                                 | 2 | 0.20% | 1.00% |
| 32 Pentose phosphate pathway (P02762)                                                         | 2 | 0.20% | 1.00% |
| 33 SCW signaling pathway (P06216)                                                             | 1 | 0.10% | 0.50% |
| 34 GBB signaling pathway (P06214)                                                             | 1 | 0.10% | 0.50% |
| 35 DPP signaling pathway (P06213)                                                             | 1 | 0.10% | 0.50% |
| 36 DPP-SCW signaling pathway (P06212)                                                         | 1 | 0.10% | 0.50% |
| 37 BMP/activin signaling pathway-drosophila (P06211)                                          | 1 | 0.10% | 0.50% |
| 38 Gonadotropin-releasing hormone receptor pathway (P06664)                                   | 1 | 0.10% | 0.50% |
| 39 Pyridoxal-5-phosphate biosynthesis (P02759)                                                | 1 | 0.10% | 0.50% |
| 40 Angiogenesis (P00005)                                                                      | 1 | 0.10% | 0.50% |
| 41 Alzheimer disease-amyloid secretase pathway (P00003)                                       | 1 | 0.10% | 0.50% |
| 42 Mannose metabolism (P02752)                                                                | 1 | 0.10% | 0.50% |
| 43 Lipoate_biosynthesis (P02750)                                                              | 1 | 0.10% | 0.50% |
| 44 p53 pathway (P00059)                                                                       | 1 | 0.10% | 0.50% |
| 45 mRNA splicing (P00058)                                                                     | 1 | 0.10% | 0.50% |
| 46 Histidine biosynthesis (P02747)                                                            | 1 | 0.10% | 0.50% |
| 47 VEGF signaling pathway (P00056)                                                            | 1 | 0.10% | 0.50% |
| 48 Tetrahydrofolate biosynthesis (P02742)                                                     | 1 | 0.10% | 0.50% |
| 49 TGF-beta signaling pathway (P00052)                                                        | 1 | 0.10% | 0.50% |
| 50 Cysteine biosynthesis (P02737)                                                             | 1 | 0.10% | 0.50% |
| 51 Notch signaling pathway (P00045)                                                           | 1 | 0.10% | 0.50% |
| 52 Chorismate biosynthesis (P02734)                                                           | 1 | 0.10% | 0.50% |
| 53 Synaptic vesicle trafficking (P05734)                                                      | 1 | 0.10% | 0.50% |
| 54 Metabotropic glutamate receptor group III pathway (P00039)                                 | 1 | 0.10% | 0.50% |
| 55 Ionotropic glutamate receptor pathway (P00037)                                             | 1 | 0.10% | 0.50% |
| 56 Vitamin B6 metabolism (P02787)                                                             | 1 | 0.10% | 0.50% |
| 57 Inflammation mediated by chemokine and cytokine signaling pathway (P00031)                 | 1 | 0.10% | 0.50% |
| 58 Thyrotropin-releasing hormone receptor signaling pathway (P04394)                          | 1 | 0.10% | 0.50% |
| 59 Oxytocin receptor mediated signaling pathway (P04391)                                      | 1 | 0.10% | 0.50% |
| 60 Heterotrimeric G-protein signaling pathway-Gi alpha and Gs alpha mediated pathway (P00030) | 1 | 0.10% | 0.50% |
| 61 Hedgehog signaling pathway (P00025)                                                        | 1 | 0.10% | 0.50% |
| 62 Sulfate assimilation (P02778)                                                              | 1 | 0.10% | 0.50% |
| 63 General transcription by RNA polymerase I (P00022)                                         | 1 | 0.10% | 0.50% |
| 64 Enkephalin release (P05913)                                                                | 1 | 0.10% | 0.50% |
| 65 Dopamine receptor mediated signaling pathway (P05912)                                      | 1 | 0.10% | 0.50% |
| 66 FAS signaling pathway (P00020)                                                             | 1 | 0.10% | 0.50% |
| 67 Histamine H2 receptor mediated signaling pathway (P04386)                                  | 1 | 0.10% | 0.50% |
| 68 Pyruvate metabolism (P02772)                                                               | 1 | 0.10% | 0.50% |

**Supplementary table 1.**

|                                                                                               |   |       |       |
|-----------------------------------------------------------------------------------------------|---|-------|-------|
| 69 Histamine H1 receptor mediated signaling pathway (P04385)                                  | 1 | 0.10% | 0.50% |
| 70 Pyridoxal phosphate salvage pathway (P02770)                                               | 1 | 0.10% | 0.50% |
| 71 Purine metabolism (P02769)                                                                 | 1 | 0.10% | 0.50% |
| 72 Beta2 adrenergic receptor signaling pathway (P04378)                                       | 1 | 0.10% | 0.50% |
| 73 Beta1 adrenergic receptor signaling pathway (P04377)                                       | 1 | 0.10% | 0.50% |
| 74 5HT2 type receptor mediated signaling pathway (P04374)                                     | 1 | 0.10% | 0.50% |
| 75 5HT1 type receptor mediated signaling pathway (P04373)                                     | 1 | 0.10% | 0.50% |
| <b>Plasmodium falciparum</b>                                                                  |   |       |       |
| 1 Ubiquitin proteasome pathway (P00060)                                                       | 8 | 1.50% | ##### |
| 2 Huntington disease (P00029)                                                                 | 5 | 0.90% | 6.30% |
| 3 Transcription regulation by bZIP transcription factor (P00055)                              | 4 | 0.80% | 5.10% |
| 4 General transcription regulation (P00023)                                                   | 4 | 0.80% | 5.10% |
| 5 DNA replication (P00017)                                                                    | 4 | 0.80% | 5.10% |
| 6 Parkinson disease (P00049)                                                                  | 4 | 0.80% | 5.10% |
| 7 Wnt signaling pathway (P00057)                                                              | 3 | 0.60% | 3.80% |
| 8 Nicotinic acetylcholine receptor signaling pathway (P00044)                                 | 3 | 0.60% | 3.80% |
| 9 p53 pathway (P00059)                                                                        | 2 | 0.40% | 2.50% |
| 10 mRNA splicing (P00058)                                                                     | 2 | 0.40% | 2.50% |
| 11 General transcription by RNA polymerase I (P00022)                                         | 2 | 0.40% | 2.50% |
| 12 Methylcitrate cycle (P02754)                                                               | 2 | 0.40% | 2.50% |
| 13 Tryptophan biosynthesis (P02783)                                                           | 2 | 0.40% | 2.50% |
| 14 CCKR signaling map (P06959)                                                                | 2 | 0.40% | 2.50% |
| 15 De novo pyrimidine ribonucleotides biosynthesis (P02740)                                   | 2 | 0.40% | 2.50% |
| 16 Pyruvate metabolism (P02772)                                                               | 2 | 0.40% | 2.50% |
| 17 Gonadotropin-releasing hormone receptor pathway (P06664)                                   | 2 | 0.40% | 2.50% |
| 18 De novo purine biosynthesis (P02738)                                                       | 1 | 0.20% | 1.30% |
| 19 Purine metabolism (P02769)                                                                 | 1 | 0.20% | 1.30% |
| 20 Alzheimer disease-presenilin pathway (P00004)                                              | 1 | 0.20% | 1.30% |
| 21 Interleukin signaling pathway (P00036)                                                     | 1 | 0.20% | 1.30% |
| 22 Alzheimer disease-amyloid secretase pathway (P00003)                                       | 1 | 0.20% | 1.30% |
| 23 Adrenaline and noradrenaline biosynthesis (P00001)                                         | 1 | 0.20% | 1.30% |
| 24 Insulin/IGF pathway-protein kinase B signaling cascade (P00033)                            | 1 | 0.20% | 1.30% |
| 25 Inflammation mediated by chemokine and cytokine signaling pathway (P00031)                 | 1 | 0.20% | 1.30% |
| 26 p53 pathway feedback loops 2 (P04398)                                                      | 1 | 0.20% | 1.30% |
| 27 Heterotrimeric G-protein signaling pathway-Gq alpha and Go alpha mediated pathway (P00032) | 1 | 0.20% | 1.30% |
| 28 Heterotrimeric G-protein signaling pathway-Gi alpha and Gs alpha mediated pathway (P00030) | 1 | 0.20% | 1.30% |
| 29 Vitamin D metabolism and pathway (P04396)                                                  | 1 | 0.20% | 1.30% |
| 30 Ras Pathway (P04393)                                                                       | 1 | 0.20% | 1.30% |
| 31 FGF signaling pathway (P00021)                                                             | 1 | 0.20% | 1.30% |
| 32 FAS signaling pathway (P00020)                                                             | 1 | 0.20% | 1.30% |



**Supplementary table 1.**

|                                                                         |   |       |       |
|-------------------------------------------------------------------------|---|-------|-------|
| 33 ATP synthesis (P02721)                                               | 1 | 0.20% | 1.30% |
| 34 TCA cycle (P00051)                                                   | 1 | 0.20% | 1.30% |
| 35 Endothelin signaling pathway (P00019)                                | 1 | 0.20% | 1.30% |
| 36 EGF receptor signaling pathway (P00018)                              | 1 | 0.20% | 1.30% |
| 37 PI3 kinase pathway (P00048)                                          | 1 | 0.20% | 1.30% |
| 38 PDGF signaling pathway (P00047)                                      | 1 | 0.20% | 1.30% |
| 39 Heme biosynthesis (P02746)                                           | 1 | 0.20% | 1.30% |
| 40 Cell cycle (P00013)                                                  | 1 | 0.20% | 1.30% |
| 41 Cadherin signaling pathway (P00012)                                  | 1 | 0.20% | 1.30% |
| 42 Muscarinic acetylcholine receptor 2 and 4 signaling pathway (P00043) | 1 | 0.20% | 1.30% |
| 43 Salvage pyrimidine ribonucleotides (P02775)                          | 1 | 0.20% | 1.30% |
